# Supplementary material
Source: ML conference proceedings conference paper supplement (https://aclanthology.org/2021.bea-1.21)
Supplement: OptionalSupplementaryMaterial [file 2021.bea-1.21.OptionalSupplementaryMaterial.zip]

Table 4: Overview of the 57 traditional and new features investigated (grouped into feature sets)

| Feature set                        | Size | Subtypes                                                                                                                                         | Example/Description                                                                                                                                      |
|------------------------------------|------|--------------------------------------------------------------------------------------------------------------------------------------------------|----------------------------------------------------------------------------------------------------------------------------------------------------------|
| Syntactic complexity               | 16   | Length of production unit<br>Subordination<br>Coordination<br>Particular structures                                                              | e.g. mean length of clause<br>e.g. clauses per sentences<br>e.g. coordinate phrases per clause<br>e.g. complex nominals per clause                       |
| Lexical richness                   | 12   | Lexical density<br>Lexical diversity<br>Lexical sophistication                                                                                   | e.g. ratio contents words / all words<br>e.g. type token ratio<br>e.g. words on General Service List                                                     |
| Register-based<br>n-gram frequency | 25   | Spoken ( $n \in [1, 5]$ )<br>Fiction ( $n \in [1, 5]$ )<br>Magazine ( $n \in [1, 5]$ )<br>News ( $n \in [1, 5]$ )<br>Academic ( $n \in [1, 5]$ ) | measures of frequencies<br>of n-grams of order 1-5<br>from five language registers<br>from the Corpus of Contemporary<br>American English (Davies, 2008) |
| Information theory                 | 3    | Kolmogorov <sub>Deflate</sub><br>Kolmogorov <sub>Deflate Syntactic</sub><br>Kolmogorov <sub>Deflate Morphological</sub>                          | measures use Deflate algorithm<br>and relate size of compressed file<br>to size of original                                                              |

Table 5: Mean scores of top-ten most discriminative language features across CEFR levels

|    | Feature        | A1     | A2     | B1     | B2     | C1     | C2     |
|----|----------------|--------|--------|--------|--------|--------|--------|
| 1  | bigramFiction  | 38.10  | 41.78  | 46.82  | 50.10  | 47.65  | 51.25  |
| 2  | bigramAcad     | 28.78  | 23.93  | 34.01  | 40.87  | 43.56  | 47.03  |
| 3  | ANC            | 0.28   | 0.25   | 0.23   | 0.24   | 0.24   | 0.26   |
| 4  | MLWc           | 4.28   | 4.08   | 4.13   | 4.37   | 4.53   | 4.47   |
| 5  | MLWs           | 1.35   | 1.28   | 1.31   | 1.40   | 1.43   | 1.40   |
| 6  | bigramSpoken   | 42.24  | 40.90  | 50.90  | 56.43  | 55.82  | 58.24  |
| 7  | unigramAcad    | 110.49 | 97.77  | 119.87 | 134.51 | 142.79 | 153.87 |
| 8  | trigramFiction | 4.10   | 4.72   | 5.53   | 5.89   | 5.13   | 5.14   |
| 9  | BNC            | 0.47   | 0.47   | 0.42   | 0.44   | 0.44   | 0.45   |
| 10 | bigramNews     | 40.15  | 38.40  | 47.30  | 52.15  | 53.26  | 55.48  |
| 11 | unigramFiction | 134.15 | 123.01 | 141.03 | 152.10 | 161.14 | 171.13 |
| 12 | NGSL           | 0.20   | 0.18   | 0.16   | 0.15   | 0.15   | 0.16   |
| 13 | LD             | 0.51   | 0.52   | 0.51   | 0.51   | 0.53   | 0.53   |
| 14 | unigramSpoken  | 137.01 | 123.94 | 144.18 | 156.25 | 166.00 | 174.82 |
| 15 | trigramNews    | 3.36   | 3.11   | 3.96   | 4.40   | 4.44   | 4.50   |
| 16 | unigramMag     | 137.09 | 123.52 | 143.35 | 155.42 | 166.28 | 175.47 |
| 17 | unigramNews    | 135.81 | 122.51 | 142.05 | 153.86 | 164.79 | 173.61 |
| 18 | bigramMag      | 33.44  | 31.43  | 38.54  | 41.67  | 43.40  | 44.12  |
| 19 | KolDef         | 0.99   | 0.96   | 1.00   | 1.03   | 1.06   | 1.08   |
| 20 | KolDefMor      | 0.94   | 0.94   | 0.94   | 0.94   | 0.94   | 0.94   |

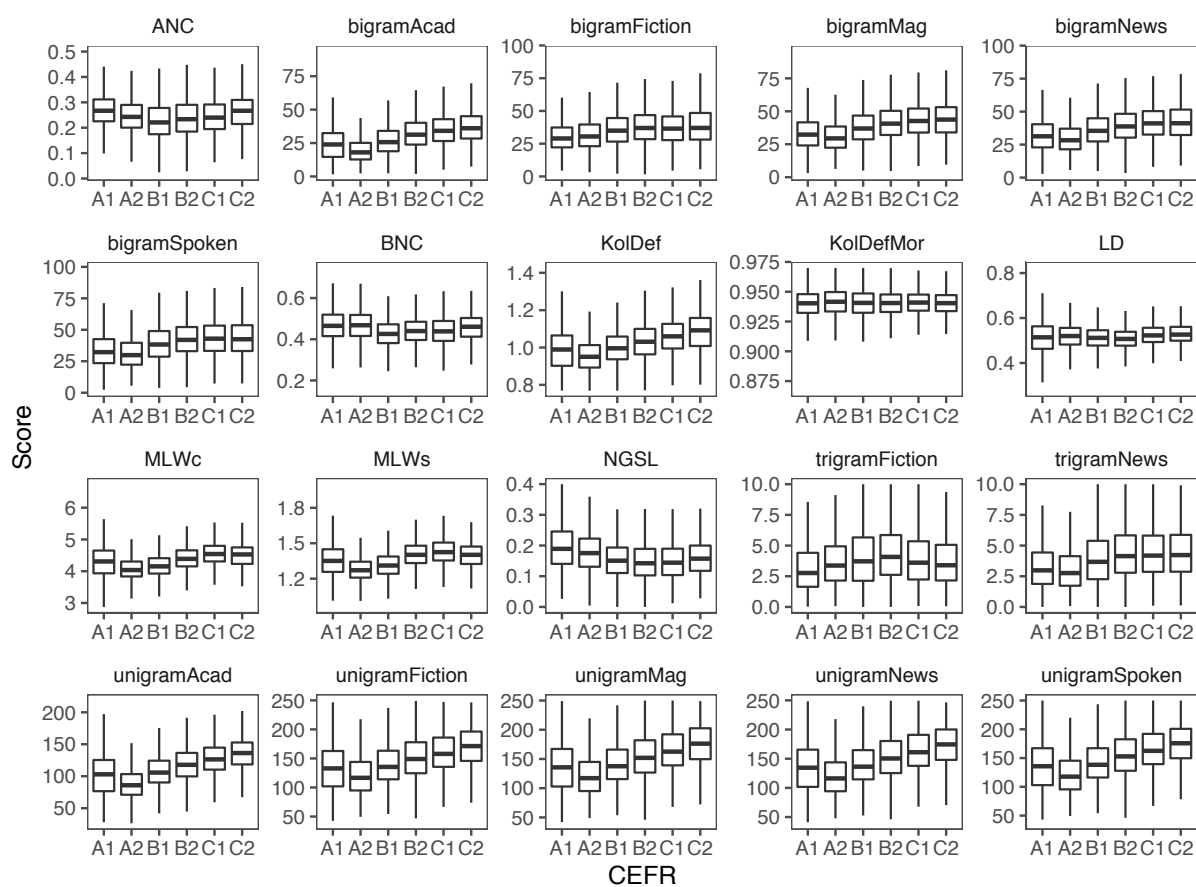

Figure 3: Distribution of scores of top-ten most discriminative language features across CEFR levels.
